# Supplementary material for: IL20RB promotes pancreatic cancer progression by activating NF- kB signalling and promoting EMT
Source: Research Square preprint supplement (doi:10.21203/rs.3.rs-5929013/v1), 2025-02-04
Supplement: Supplementary file 1 [file c2e282dfa76d6d869319b21d.docx]

Table S1 Primer sequences for RT-PCR

| Primer names | Sequence (5' to 3') |
| --- | --- |
| IL20RB | F：ACTGAAGGTCCTGAGTGTGATGTC |
| R：TGAGGTCTGTGAGCCCAATGTG |
| GAPDH | F：CTCCAAAATCAAGTGGGGCG |
| R：TGGTTCACACCCATGACGAA |

Table S2 Lentiviral vector sequence and titer table

| Name | Sequence | Titer |
| --- | --- | --- |
| Negative Control | TTCTCCGAACGTGTCACGT | 3.0×108 |
| IL20RB-sh1 | CCGGCAGTGTACTATTCTGTCGAATCTCGAGATTCGACAGAATAGTACACTGTTTTTG | 2.0×109 |
| IL20RB-sh2 | CCGGGCAATGGTGTTGAGTTCACTTCTCGAGAAGTGAACTCAACACCATTGCTTTTTG | 2.0×109 |
| IL20RB-sh3 | CCGGCCAGAATAATCCTTGAGAGAACTCGAGTTCTCTCAAGGATTATTCTGGTTTTTG | 2.0×109 |
